# Supplementary material
Source: PubMed Central journal article supplement (PMC7043080)

**Supplementary Table 1.** Comparison of patient demographics and disease characteristics between patients in and not in clinical remission at time of therapeutic drug monitoring for vedolizumab. FDR, false discovery rate.

|                                             | <b>Clinical Remission (n=57)</b> | <b>Not in Clinical Remission (n=16)</b> | <b>p-value</b>  | <b>FDR p-value</b> |
|---------------------------------------------|----------------------------------|-----------------------------------------|-----------------|--------------------|
| Median age, years (IQR)                     | 37.8 (27.3-57.9)                 | 32.8 (27.2-53.4)                        | 0.59            | 0.79               |
| Male gender, n (%)                          | 32 (56.1)                        | 7 (43.8)                                | 0.38            | 0.67               |
| Median disease duration, years (IQR)        | 11.9 (7.0-18.9)                  | 15 (8.8-26.3)                           | 0.31            | 0.64               |
| Diagnosis of CD, n (%)                      | 31 (54.4)                        | 12 (75.0)                               | 0.50            | 0.78               |
| Active smoking, n (%)                       | 6 (10.5)                         | 2 (12.5)                                | 0.82            | 0.96               |
| Previous anti-TNF exposure, n (%)           | 27 (47.4)                        | 13 (81.3)                               | <b>0.02</b>     | 0.14               |
| Concomitant immunomodulator, n (%)          | 11 (19.3)                        | 4 (25.0)                                | 0.62            | 0.79               |
| Median duration on vedolizumab, years (IQR) | 1.6 (0.8-2.1)                    | 1.4 (0.9-2.5)                           | 0.97            | 0.97               |
| 4-weekly dosing, n (%)                      | 7 (12.3)                         | 7 (43.8)                                | <b>&lt;0.01</b> | <b>&lt;0.01</b>    |
| Median BMI (IQR)                            | 25.4 (22.7-29.0)                 | 25.7 (18.7-32.8)                        | 0.97            | 0.97               |
| Median Albumin, g/dL (IQR)                  | 36.0 (34.0-38.0)                 | 34.0 (31.3-36.8)                        | <b>0.04</b>     | 0.19               |
| Median CRP, mg/L (IQR)                      | 3.0 (1.0-4.5)                    | 4.0 (1.3-11.0)                          | 0.17            | 0.60               |
| Median FC, µg/g (IQR)                       | 62.0 (20.0-447.0)                | 130.0 (55.5-529.3)                      | 0.32            | 0.64               |
| Biologic remission, n (%)                   | 33 (57.9)                        | 7 (43.8)                                | 0.32            | 0.64               |

**Supplementary Table 2.** Comparison of patient demographics and disease characteristics between patients in and not in biologic remission at time of therapeutic drug monitoring for vedolizumab. FDR, false discovery rate.

|                                             | <b>Biologic Remission (n=40)</b> | <b>Not in Biologic Remission (n=33)</b> | <b>p-value</b>  | <b>FDR p-value</b> |
|---------------------------------------------|----------------------------------|-----------------------------------------|-----------------|--------------------|
| Median age, years (IQR)                     | 34.5 (25.8-49.6)                 | 40.8 (29.0-62.1)                        | 0.32            | 0.48               |
| Male gender, n (%)                          | 19 (47.5)                        | 20 (60.6)                               | 0.26            | 0.48               |
| Median disease duration, years (IQR)        | 12.5 (8.2-20.8)                  | 8.9 (6.4-18.9)                          | 0.44            | 0.54               |
| Diagnosis of CD, n (%)                      | 22 (55.0)                        | 21 (63.6)                               | 0.45            | 0.54               |
| Active smoking, n (%)                       | 3 (7.5)                          | 5 (15.2)                                | 0.30            | 0.48               |
| Previous anti-TNF exposure, n (%)           | 22 (55.0)                        | 18 (54.5)                               | 0.97            | 0.97               |
| Concomitant immunomodulator, n (%)          | 5 (12.5)                         | 10 (30.3)                               | 0.06            | 0.24               |
| Median duration on vedolizumab, years (IQR) | 1.6 (1.0-2.3)                    | 1.3 (0.7-1.9)                           | 0.12            | 0.36               |
| 4-weekly dosing, n (%)                      | 3 (7.5)                          | 11 (33.3)                               | <b>&lt;0.01</b> | <b>&lt;0.01</b>    |
| Median BMI (IQR)                            | 25.0 (22.5-29.0)                 | 26.2 (22.3-31.7)                        | 0.82            | 0.90               |
| Median Albumin, g/dL (IQR)                  | 37.5 (35.3-39.0)                 | 35.0 (32.0-36.0)                        | <b>&lt;0.01</b> | <b>&lt;0.01</b>    |
| Clinical remission, n (%)                   | 33 (82.5)                        | 24 (72.7)                               | 0.32            | 0.48               |

**Supplementary Table 3.** Comparison of patient demographics and disease characteristics between patients in and not in endoscopic remission +/- 8 weeks from therapeutic drug monitoring for vedolizumab. FDR, false discovery rate.

|                                             | <b>Endoscopic Remission (n=14)</b> | <b>Not in Endoscopic Remission (n=26)</b> | <b>p-value</b>  | <b>FDR p-value</b> |
|---------------------------------------------|------------------------------------|-------------------------------------------|-----------------|--------------------|
| Median age, years (IQR)                     | 43.2 (31.0-60.8)                   | 35.9 (28.7-61.7)                          | 0.66            | 0.78               |
| Male gender, n (%)                          | 7 (50.0)                           | 13 (50.0)                                 | 0.99            | 0.99               |
| Median disease duration, years (IQR)        | 15.9 (10.0-19.9)                   | 12.0 (5.9-29.0)                           | 0.43            | 0.77               |
| Diagnosis of CD, n (%)                      | 6 (42.9)                           | 16 (61.5)                                 | 0.26            | 0.56               |
| Active smoking, n (%)                       | 1 (7.1)                            | 6 (23.1)                                  | 0.21            | 0.56               |
| Previous anti-TNF exposure, n (%)           | 8 (57.1)                           | 16 (61.5)                                 | 0.79            | 0.86               |
| Concomitant immunomodulator, n (%)          | 5 (35.7)                           | 5 (19.2)                                  | 0.25            | 0.56               |
| Median duration on vedolizumab, years (IQR) | 1.1 (0.6-2.0)                      | 1.4 (0.8-2.3)                             | 0.63            | 0.78               |
| 4-weekly dosing, n (%)                      | 1 (7.1)                            | 8 (30.8)                                  | 0.09            | 0.56               |
| Median BMI (IQR)                            | 26.7 (24.0-40.0)                   | 25.0 (22.2-30.0)                          | 0.13            | 0.56               |
| Median Albumin, g/dL (IQR)                  | 35.5 (33.8-37.3)                   | 34.5 (32.8-37.0)                          | 0.48            | 0.77               |
| Clinical remission, n (%)                   | 10 (71.4)                          | 16 (61.5)                                 | 0.53            | 0.77               |
| Biologic remission, n (%)                   | 12 (85.7)                          | 7 (26.9)                                  | <b>&lt;0.01</b> | <b>&lt;0.01</b>    |

**Supplementary Table 4.** Comparison of patient demographics and disease characteristics between patients in and not in deep remission +/- 8 weeks from therapeutic drug monitoring for vedolizumab. FDR, false discovery rate.

|                                             | <b>Deep Remission<br/>(n=10)</b> | <b>Not in Deep<br/>Remission<br/>(n=30)</b> | <b>p-value</b>  | <b>FDR<br/>p-value</b> |
|---------------------------------------------|----------------------------------|---------------------------------------------|-----------------|------------------------|
| Median age, years (IQR)                     | 52.0 (31.0-67.6)                 | 35.9 (29.0-60.3)                            | 0.38            | 0.65                   |
| Male gender, n (%)                          | 6 (60.0)                         | 7 (23.3)                                    | <b>0.03</b>     | 0.15                   |
| Median disease duration, years (IQR)        | 16.3 (10.9-19.9)                 | 12.0 (6.7-28.3)                             | 0.49            | 0.65                   |
| Diagnosis of CD, n (%)                      | 3 (30.0)                         | 20 (66.7)                                   | <b>0.04</b>     | 0.15                   |
| Active smoking, n (%)                       | 1 (10.0)                         | 3 (10.0)                                    | 0.99            | 0.99                   |
| Previous anti-TNF exposure, n (%)           | 4 (40.0)                         | 20 (66.7)                                   | 0.14            | 0.34                   |
| Concomitant immunomodulator, n (%)          | 3 (30.0)                         | 7 (23.3)                                    | 0.67            | 0.80                   |
| Median duration on vedolizumab, years (IQR) | 1.3 (0.6-2.0)                    | 1.3 (0.7-2.3)                               | 0.94            | 0.99                   |
| 4-weekly dosing, n (%)                      | 0                                | 9 (30.0)                                    | <b>0.049</b>    | 0.15                   |
| Median BMI (IQR)                            | 25.8 (23.1-41.4)                 | 25.1 (22.4-30.7)                            | 0.48            | 0.65                   |
| Median Albumin, g/dL (IQR)                  | 35.0 (33.8-38.0)                 | 35.0 (32.8-36.3)                            | 0.38            | 0.65                   |
| Biologic remission, n (%)                   | 9 (90.0)                         | 10 (33.3)                                   | <b>&lt;0.01</b> | <b>0.02</b>            |

**Supplementary Figure 1.** Association of trough vedolizumab levels with (A) clinical remission; (B) biologic remission; (C) endoscopic remission; and (D) deep remission after omitting patients on 4-weekly dosing. Violin plots show median (solid line), interquartile range (dotted line), maximum and minimum.

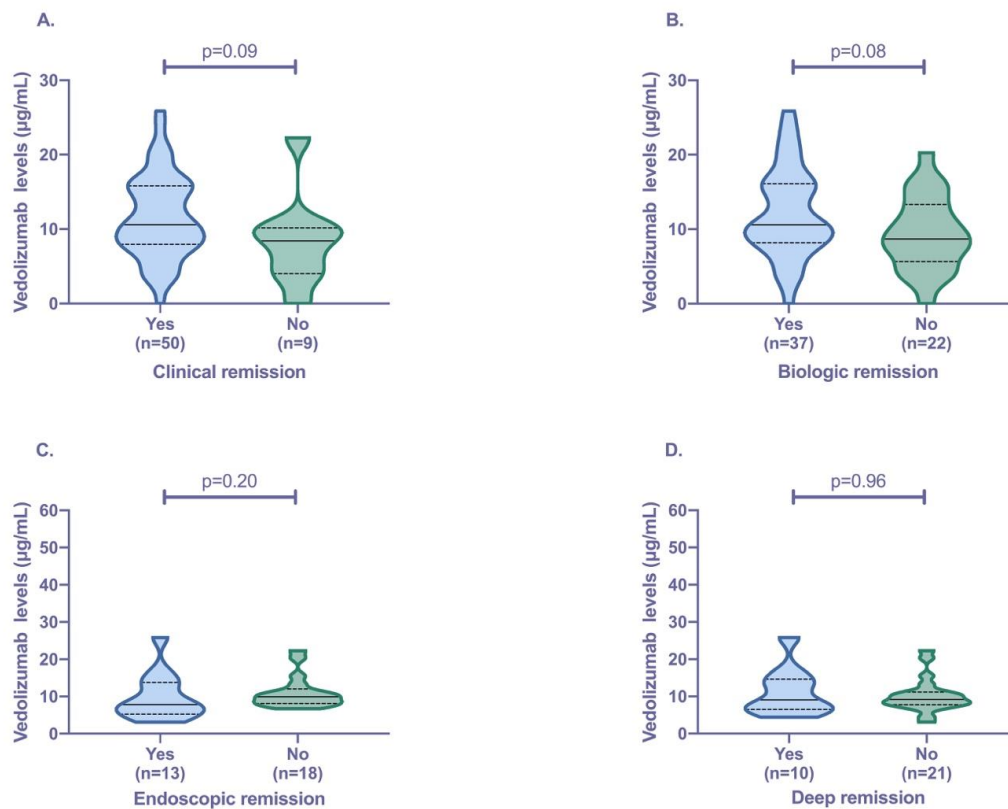

**Supplementary Figure 2.** Association of trough vedolizumab levels with (A) biologic remission defined as CRP < 5mg/L plus faecal calprotectin <150 µg/g and (B) biologic remission defined as CRP < 5mg/L plus faecal calprotectin <50 µg/g. Violin plots show median (solid line), interquartile range (dotted line), maximum and minimum.

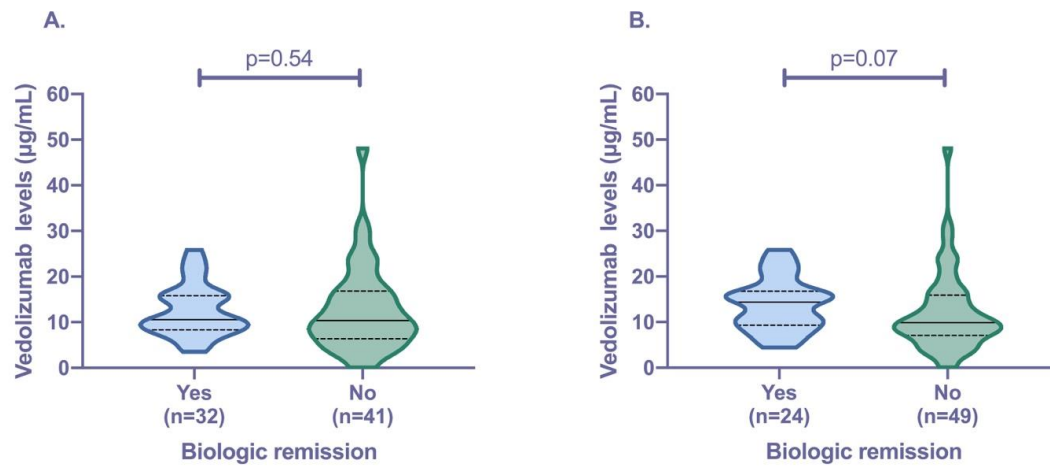

Supplement: flgastro-2019-101197supp001.pdf [file flgastro-2019-101197supp001.pdf]
